# Supplementary material
Source: Springer Nature journal article supplement (https://www.springermedizin.de/resource/supplementary/12905_2012_504_MOESM6_ESM.pdf/9518634)
Supplement: MOESM6 [file 9518634]

**Table 5: Logistic regression of predictors of intimate partner violence perpetration**

| <b>Characteristics</b>                      | <b>Odds Ratio</b> | <b>Confidence Interval</b> | <b>p-value</b> |
|---------------------------------------------|-------------------|----------------------------|----------------|
| <b>Partner's educational level</b>          |                   |                            |                |
| Primary                                     | 2.038             | 1.036-4.008                | 0.002          |
| Secondary                                   | 1.377             | 0.539-3.521                | 0.479          |
| Tertiary                                    | 1.000             |                            |                |
| <b>Partner has history of fighting</b>      |                   |                            |                |
| Yes                                         | 2.434             | 1.036-4.008                | 0.002          |
| No                                          | 1.000             |                            |                |
| <b>Partner mistreated in childhood</b>      |                   |                            |                |
| Yes                                         | 2.699             | 2.007-3.629                | <0.001         |
| No                                          | 1.000             |                            |                |
| <b>Partner sexually abused in childhood</b> |                   |                            |                |
| Yes                                         | 1.005             | 0.659-1.533                | 0.981          |
| No                                          | 1.000             |                            |                |
| <b>Partner smokes</b>                       |                   |                            |                |
| Yes                                         | 1.624             | 0.972-2.715                | 0.064          |
| No                                          | 1.000             |                            |                |
| <b>Partner consumes Alcohol</b>             |                   |                            |                |
| Yes                                         | 1.913             | 1.459-2.509                | <0.001         |
| No                                          | 1.000             |                            |                |
